# Supplementary material for: In-site synthesis of an inorganic-framework molecular imprinted TiO2/CdS heterostructure for the photoelectrochemical sensing of bisphenol A
Source: Royal Society of Chemistry journal article supplement (doi:10.1039/d1ay00620g), 2021-01-01
Supplement: d1ay00620g1.pdf [file d1ay00620g1.pdf]

## Supporting Information

### **In-site synthesis inorganic-framework molecular imprinting TiO<sub>2</sub>/CdS heterostructure for photoelectrochemical sensing of bisphenol A**

Lan Wang,<sup>\*a</sup> Huan Zhang,<sup>a</sup> Hang Shi,<sup>a</sup> Baodan Jin,<sup>a</sup> Xiaoyun Qin,<sup>a</sup> Geng Wang,<sup>a</sup>

Kucong Li,<sup>a</sup> Tingting Zhang<sup>a</sup> and Hongzhong Zhang<sup>\*a</sup>

*<sup>a</sup>Henan collaborative Innovation Center of Environmental Pollution Control and Ecological Restoration, School of Material and Chemical Engineering, Zhengzhou University of Light Industry, Zhengzhou 450001, China*

\*Corresponding author

Tel/Fax: 86-10-63556510

E-mail address: lwang2017@zzuli.edu.cn and zhz@zzuli.edu.cn

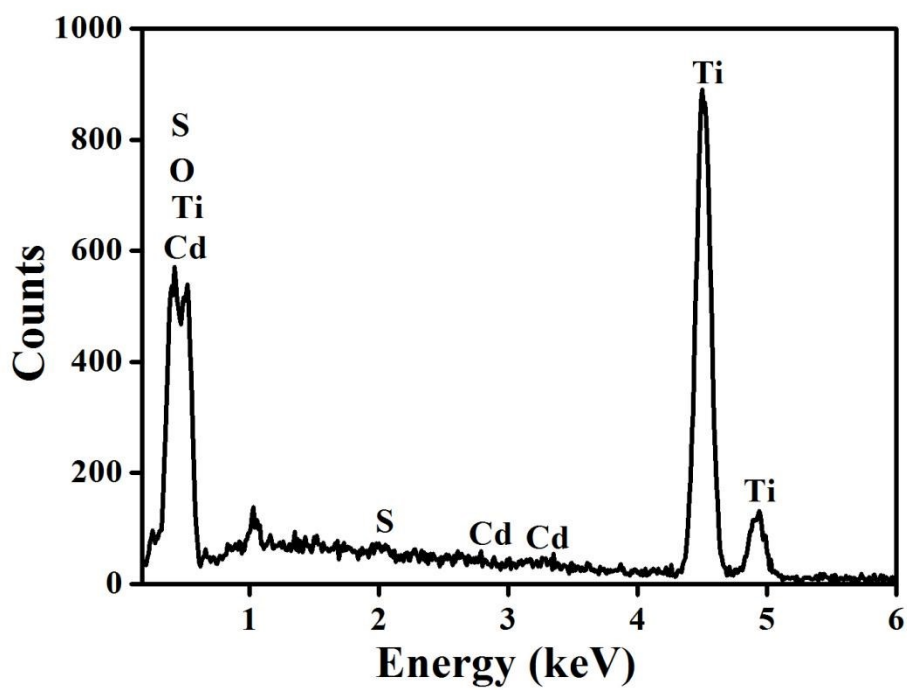

Fig. S1. EDS spectra of MI-TiO<sub>2</sub>/CdS composite

In this work, all EIS data were treated and analyzed using the software of Zview2. The simulated equivalent circuit (Fig. S2) is composed of four elements, including solution resistance ( $R_s$ ), charge-transfer resistance ( $R_{ct}$ ), constant-phase element (CPE), and Warburg impedance ( $W_o$ ). Also, each electrochemical measurement was repeated at least three times and tested with different electrodes to ensure the accuracy of the experimental data.

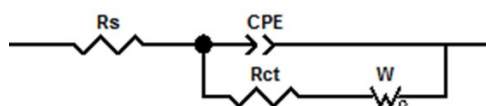

Fig. S2 The equivalent circuit

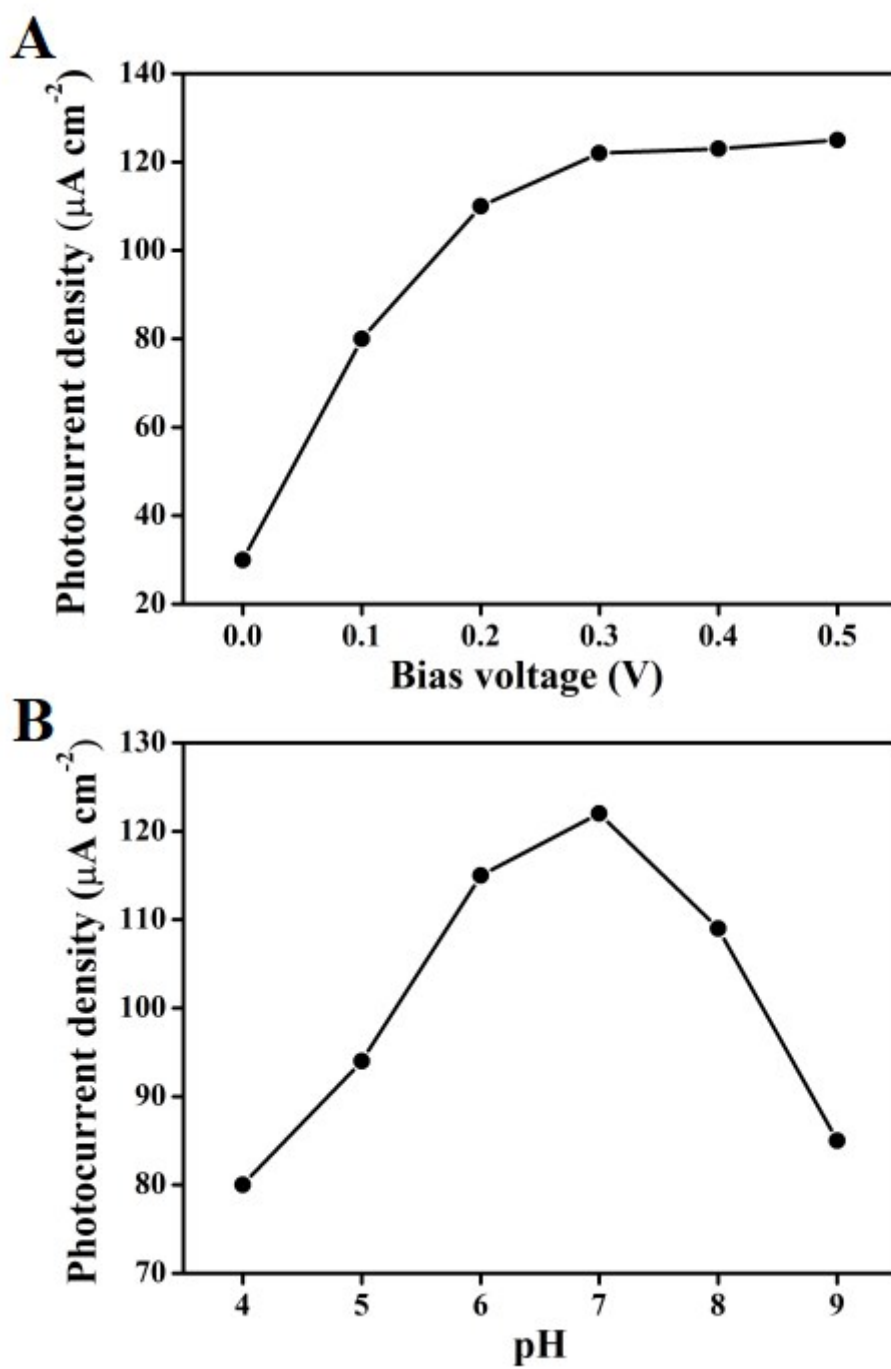

Fig. S3. Photocurrent responses at the different bias potential (A) and pH value (B).

Table. 1. Comparison of different methods for bisphenol A determination.

| Methods        | Analytical range                                                              | LOD                                                    | Ref. |
|----------------|-------------------------------------------------------------------------------|--------------------------------------------------------|------|
| EC sensor      | 0.01-20 $\mu\text{mol}\cdot\text{L}^{-1}$                                     | 3.0 $\text{nmol}\cdot\text{L}^{-1}$                    | [1]  |
| ECL sensor     | $2.28\times 10^{-8}$ - $2.28\times 10^{-2}$<br>$\text{mol}\cdot\text{L}^{-1}$ | $7.53\times 10^{-9}$<br>$\text{mol}\cdot\text{L}^{-1}$ | [2]  |
| SERS           | $1.0\times 10^{-8}$ - $1.0\times 10^{-3}$ $\text{mol}\cdot\text{L}^{-1}$      | $4.3\times 10^{-9}$ $\text{mol}\cdot\text{L}^{-1}$     | [3]  |
| PEC Aptasensor | $5\times 10^{-11}$ - $5\times 10^{-5}$ $\text{g L}^{-1}$                      | $1.6\times 10^{-11}$ $\text{g L}^{-1}$                 | [4]  |
| PEC            | 0.01-30.0 $\text{nmol}\cdot\text{L}^{-1}$                                     | 0.004 $\text{nmol}\cdot\text{L}^{-1}$                  | [5]  |
| This work      | 1-100 $\text{pmol}\cdot\text{L}^{-1}$                                         | 0.5 $\text{pmol}\cdot\text{L}^{-1}$                    |      |

## References

- [1] D.-N. Pei, A.-Y. Zhang, X.-Q. Pan, Y. Si, H.-Q. Yu, Electrochemical Sensing of Bisphenol A on Facet-Tailored  $\text{TiO}_2$  Single Crystals Engineered by Inorganic-Framework Molecular Imprinting Sites, *Analytical Chemistry*, 90 (2018) 3165-3173.
- [2] X. Liu, L. Luo, L. Li, Z. Di, J. Zhang, T. You, An electrochemiluminescence aptasensor for analysis of bisphenol A based on carbon nanodots composite as co-reaction of  $\text{Ru}(\text{bpy})_3^{2+}$  nanosheets, *Electrochimica Acta*, 319 (2019) 849-858.
- [3] L. Yang, Y. Chen, Y. Shen, M. Yang, X. Li, X. Han, X. Jiang, B. Zhao, SERS strategy based on the modified Au nanoparticles for highly sensitive detection of bisphenol A residues in milk, *Talanta*, 179 (2018) 37-42.
- [4] L. Xu, W. Duan, F. Chen, J. Zhang, H. Li, A photoelectrochemical aptasensor for the determination of bisphenol A based on the Cu (I) modified graphitic carbon nitride, *Journal of hazardous materials*, 400 (2020) 123162-123162.
- [5] P. Gao, H. Wang, P. Li, W. Gao, Y. Zhang, J. Chen, N. Jia, In-site synthesis molecular imprinting  $\text{Nb}_2\text{O}_5$  -based photoelectrochemical sensor for bisphenol A detection, *Biosensors and Bioelectronics*, 121 (2018) 104-110.
